# Supplementary material
Source: Springer Nature journal article supplement (https://www.springermedizin.de/resource/supplementary/12885_2011_2655_MOESM4_ESM.pdf/9461674)

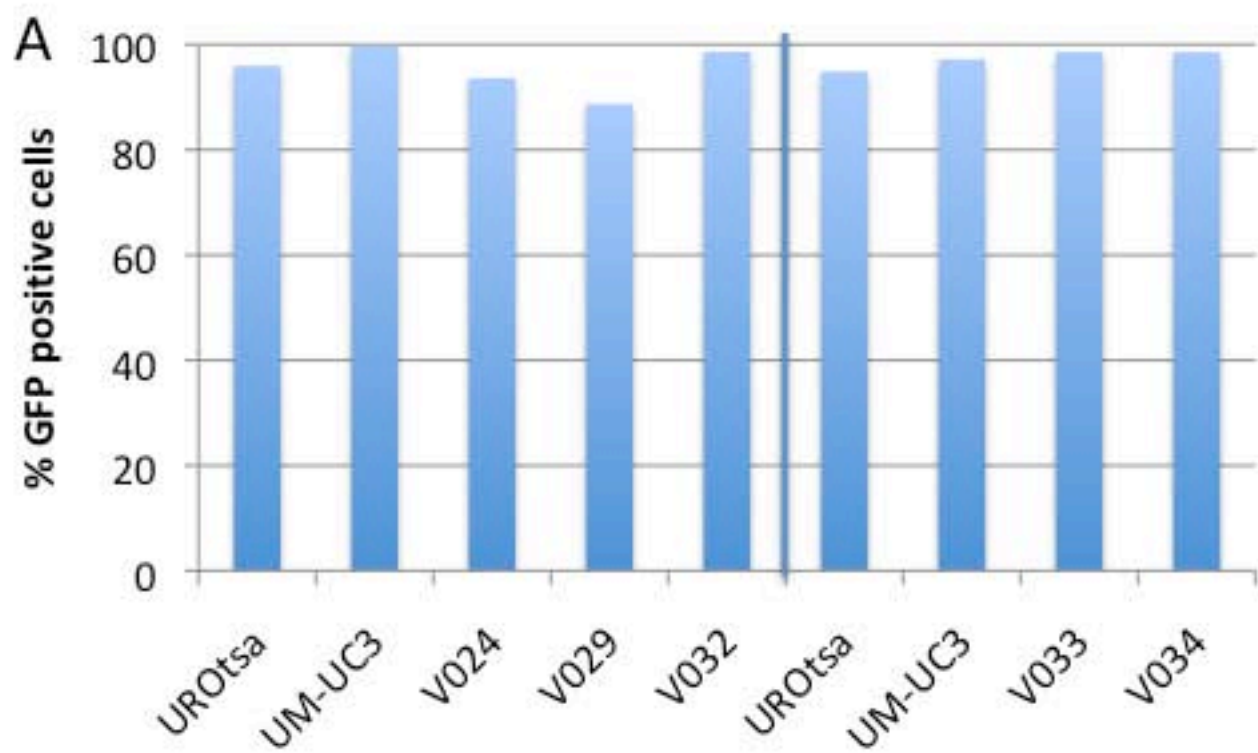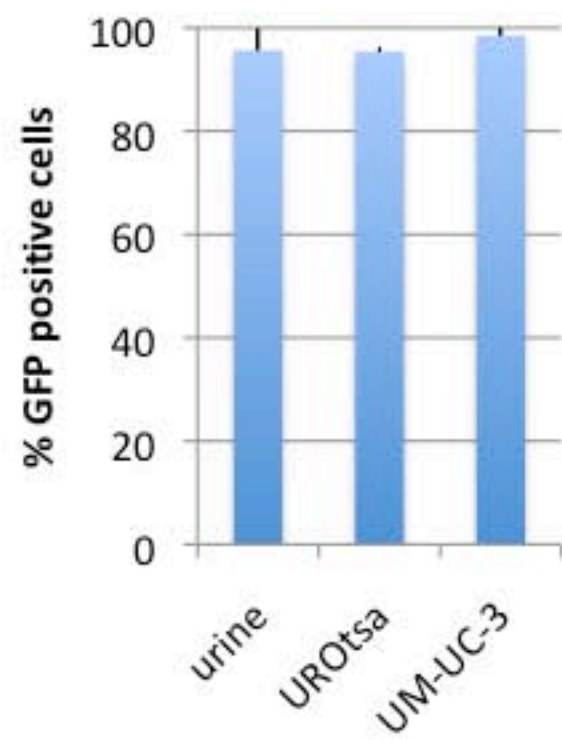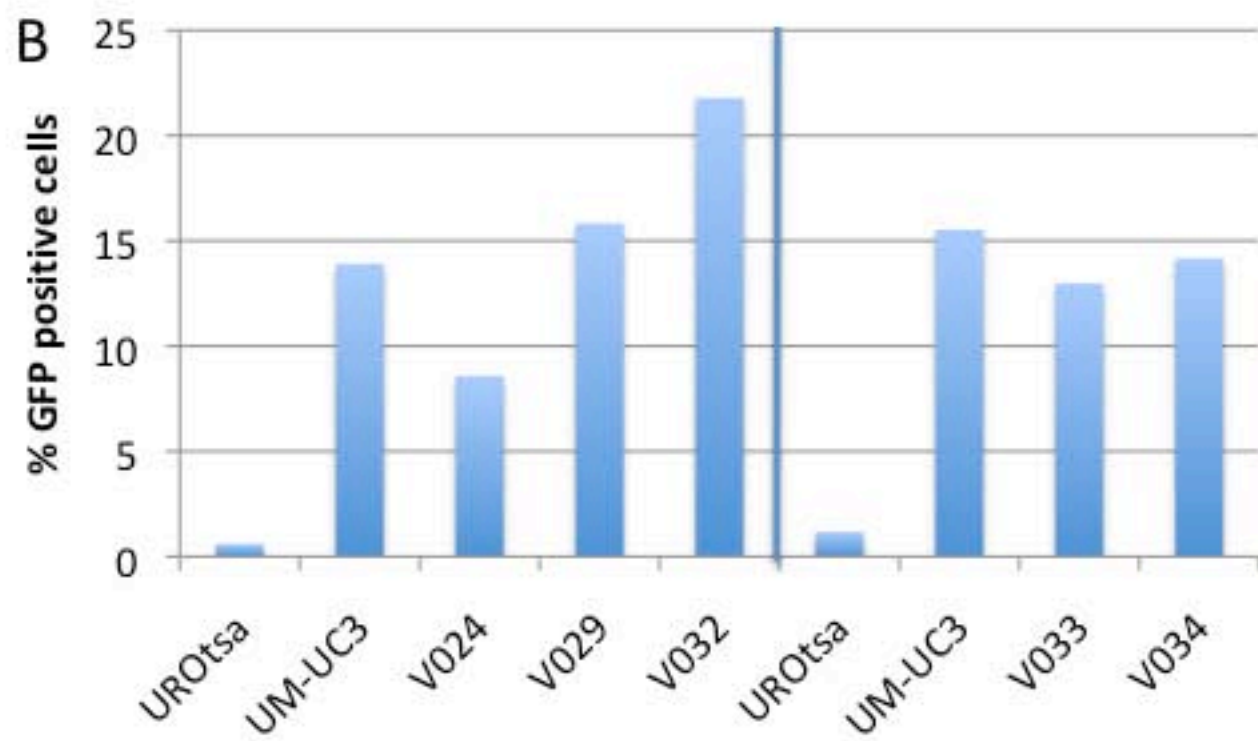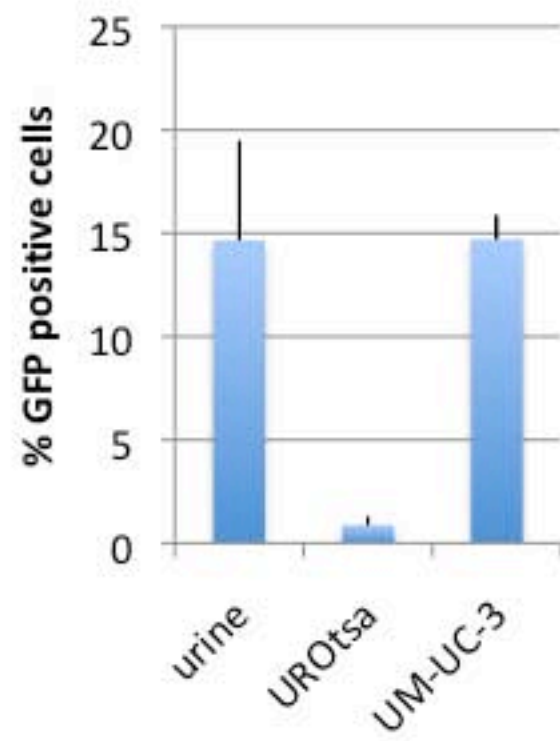

Supplement: MOESM4 [file 9461674]
